## **Use of Biochemical Biomarkers to Evaluate the Role of Oxidative Stress in the Progression of COVID-19 Severity**

Luis Marcano-Marcano (Corresponding Author): Faculty of Chemical and Biological Sciences, Mariano Gálvez University of Guatemala, Guatemala City, Guatemala 3a Avenida 9-00 Zone 2, Interior Finca El Zapote. [Amalio1795@gmail.com](mailto:Amalio1795@gmail.com)

Chemist-Biologist. Faculty of Chemical and Biological Sciences, Universidad Mariano Gálvez de Guatemala, Guatemala City, Guatemala.

Raquel Salazar-Lugo: School of Sciences, Department of Bioanalysis, Sucre Campus, University of Oriente, Venezuela. Postal Code: 6101.

PhD in Biological Sciences; FONACIT Researcher, Venezuela; and SENECYT, Ecuador. Head of the Protein and Immunotoxicity Laboratory, Applied Biology Postgraduate Program; Full Professor of Biochemistry and Research Methodology. Department of Bioanalysis, School of Sciences, University of Oriente, Venezuela. [rsalazarlugo50@gmail.com](mailto:rsalazarlugo50@gmail.com)

## **Abstract**

The role of oxidative stress and the use of biochemical biomarkers in the severity of COVID-19 was evaluated through a literature review (2020–2021) using scientific search engines such as PubMed, Science Direct, and Google Scholar. The search was limited to articles published in Spanish or English that reported on COVID-19 and its relationship with oxidative stress, following PRISMA-2020 guidelines. The search terms included oxidative stress, COVID-19, SARS-CoV-2, oxidative biomarkers, and oxidative damage. 93.5% of the selected studies were from the year 2021. These studies evaluated both oxidative stress biomarkers and oxidative damage biomarkers in COVID-19 patients. The reviewed studies reinforce the strong association of SARS-CoV-2 with oxidative stress and demonstrate how SARS-CoV-2-induced ROS production and disruption of the antioxidant defense system trigger a pro-inflammatory environment and cause severe tissue damage. In 64.7% of the studies, a combination of oxidative stress biomarkers (antioxidant and oxidative damage biomarkers) was used to assess COVID-19 severity. The most commonly used antioxidant biomarkers were thiols and total antioxidant capacity, followed by glutathione. The most commonly used oxidative damage biomarkers were malondialdehyde and peroxides, followed by advanced oxidation protein products. COVID-19 leads to a decrease in the antioxidant defense system, reflected by a decrease in antioxidant biomarkers and an increase in oxidative damage biomarkers.

**Keywords:** COVID-19, oxidative damage, SARS-CoV-2, glutathione, thiols, malondialdehyde, total antioxidant capacity.

## Introduction

The severe viral infection caused by COVID-19 has become a challenge for the scientific community due to the complexity of the biochemical and cellular events involved that drive the host's pathological responses, contributing to the severity of the disease (Delgado-Roche and Mesta 2020). One of the aspects to consider in determining the severity of COVID-19 is the oxidative state presented by individuals, which could be a determinant of the infection's evolution.

In general terms, respiratory viral infections are associated with inflammatory processes that may be linked to a redox imbalance or oxidative stress (Suhail et al. 2020). Based on an exhaustive literature analysis, Polonikov (2020) has proposed that endogenous glutathione deficiency, a tripeptide considered the main cellular antioxidant, could be a crucial factor in the increased oxidative damage induced by SARS-CoV-2 in the lungs. Consistent with these findings, it has been observed that the reduction of protein sulfhydryl groups (cysteine SH groups) weakens the binding of the SARS-CoV/CoV-2 spike protein, which points to a molecular basis that explains the severity of COVID-19 infection due to oxidative stress (Hati and Bhattacharyya 2020).

Oxidative stress (OS) is produced by an inadequate distribution between the production of reactive oxygen species (ROS) and antioxidant defenses (Betteridge 2000). Most scientists define OS as a vast region of reactions and interactions between ROS and other highly reactive species, including free radicals. The imbalance in the body's antioxidant system produced by OS can be a life-threatening factor, as the overproduction of ROS and the deprivation of antioxidant mechanisms are crucial for viral replication and the subsequent disease associated with the SARS-CoV-2 virus. OS can occur or be controlled by many agents: genetic background, biological enzymatic processes, lifestyle, and all related aspects (Demirci-Çekiç et al., 2022). The close connection between respiratory viral infections and the generation and spread of ROS strongly involves OS in the severity of COVID-19 (Muhoberac 2020).

There are OS biomarkers that could be effectively used for the prognosis and monitoring of COVID-19. These biomarkers include antioxidant molecules (antioxidant vitamins; vitamin

A, vitamin C, vitamin D, and vitamin E), molecules such as glutathione, thiols, and beta-carotene; antioxidant enzymes (endogenous glutathione (GSH), glutathione peroxidase (GPx), superoxide dismutase (SOD), free elements (Mn, Zn, Cu, Cr, and Se); and oxidative damage biomarkers (malondialdehyde, advanced oxidation protein products, ischemia-modified albumin, oxidized low-density lipoproteins), among others that stand out as oxidative damage biomarkers of lipids (Delgado-Roche and Mesta 2020), proteins (ischemia-modified albumin, advanced oxidation protein products (Cristani et al. 2015; Shevtsova et al. 202). Analytical follow-up of the antioxidant system can help prevent disease progression; thus, these biomarkers could be included in the prescribed tests to monitor COVID-19 patients, providing more analytical information to the physician.

As of February 1, 2022, the pandemic caused by the SARS-CoV-2 coronavirus, responsible for COVID-19, has resulted in 56 million deaths and over 376 million confirmed cases worldwide, with the United States of America leading in the number of infections and deaths, followed by India, Brazil, and Russia (WHO 2022). In Guatemala, by the end of January 2022, approximately 1% of the population (689,609 people) had been infected with the virus, with 16,379 deaths reported (WHO 2022).

This study aims to evaluate the role of oxidative stress in the progression of COVID-19 severity through the use of biochemical biomarkers; this will be done through a scoping review. Given the current relevance of this disease, it is important for the research group to compile information. The results of this scoping review will provide valuable information to clinical researchers and students in health-related fields interested in deepening their knowledge about the COVID-19 pandemic from a perspective that involves the individual's OS as a major comorbidity for the progression of this disease.

## **Materials and Methods**

### ***Study Design***

This work was conducted as a scoping review. A scoping review aims to extract key concepts from cutting-edge literature in a research area. This design was chosen because it provides a broader scope of specific field coverage. In this particular review, the purpose is to clarify concepts and inform the state of the art regarding oxidative stress and its relationship with

COVID-19 severity, as well as to report on the analytical tests used to evaluate the oxidative status of individuals with COVID-19. The inclusion criteria applied were: articles in Spanish or English, experimental or clinical, published in the last 2 years (due to the novelty of the topic), that included the full text, and that focused on assessing oxidative stress as a risk factor for the development of COVID-19 severity.

The study was conducted in Guatemala City from February 2020 to January 2022.

### *Instruments and Data Analysis*

This scoping review followed the steps of a systematic review but with a broader scope. PRISMA guidelines for systematic reviews and the Joanna Briggs Institute guidelines for scoping reviews were adhered to (Peters, 2015).

For data collection, the procedure proposed by Arksey and O'Malley (2007) was used. For the development of this scoping review, original articles published in the last two years (2020–October 2021) were included from the following databases: PubMed, Google Scholar, and ScienceDirect. The search was limited to full-text articles published in Spanish or English and focused on original research reporting on COVID-19 and its relationship with oxidative stress according to the PRISMA-2009 checklist criteria.

The following search terms were used: oxidative stress, COVID-19, oxidative damage, SARS-CoV-2, oxidative stress biomarkers, and oxidative damage biomarkers. The search terms were kept broad to cover all potential applicable studies.

## Results

A total of 1,536 abstracts were identified, and 65 documents were categorized after primary exclusion. Of the categorized works, 23 studies from indexed scientific journals were included (Figure 1).

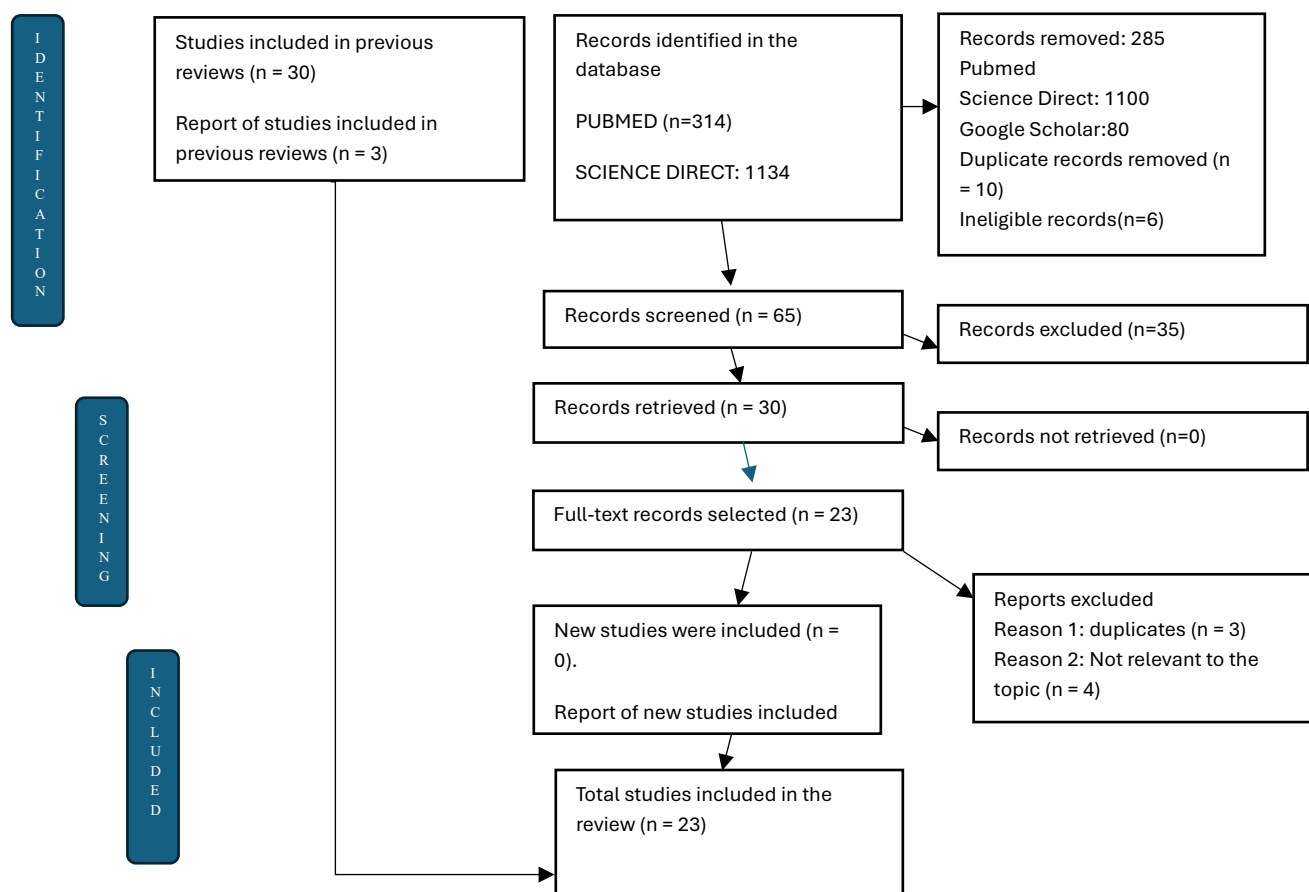

*Figure.*

PRISMA 2020 flow diagram for updated scoping review, including database research (Page et al., 2021).

93.5% of the selected studies are from the year 2021. Six (6) studies were basic research investigations whose results show evidence linking the redox state of the cell with COVID-19 (Table 1). The studies present results indicating that an oxidized state of the molecules involved in viral recognition and cell entry facilitates infection, as indicated by Hati and Bhattacharyya (2021) in a study based on a simulation of the proteins involved in the initial viral recognition, such as the ACE2 receptor and the viral spike protein, and their conformational arrangement in an oxidized state, which allows greater success in viral recognition and thus infection.

Manek-Keber et al. (2021) experimentally demonstrate the role of the oxidized state of the ACE2 receptor and the spike protein in the success of SARS-CoV-2 infection, coinciding with what was proposed by Hati and Bhattacharyya (2020) in their molecular simulation study.

Another study conducted on Vero 6 cells, which the authors identify as a well-characterized in vitro model of SARS-CoV-2 infection, showed the involvement of the organism's oxidative system in infection progression (Bartolini et al., 2021).

Studies on proteins directly related to oxidative stress showed that COVID-19 patients with the GSTT1<sup>-/-</sup> genotype, which codes for the glutathione S-transferase (GST) enzyme, exhibited higher mortality (Abbas et al., 2021). This is an important enzyme that catalyzes the conjugation of glutathione (GSH) with electrophiles to protect the cell from oxidative damage and participates in the antioxidant defense mechanism in the lungs. It was also demonstrated that oxidative and antioxidant response genes were upregulated in the lungs and leukocytes of COVID-19 patients (Sharif-Askari et al., 2021).

The aforementioned findings constitute evidence of the involvement of the organism's oxidative state in the progression of the disease caused by the SARS-CoV-2 virus and indicate that an oxidized environment facilitates the virulence and severity of SARS-CoV-2. This may explain why the severity of infection is greater in people with underlying pathologies associated with reduced antioxidant defenses (Korakas et al., 2020; Cordtz et al., 2021).

**Table 1**

*Experimental basic research studies evaluating the role of the oxidative system in the progression of COVID-19.*

| No. | TITLE                                                                                                                                                  | OBJECTIVE                                                                                                                                           | RELEVANT RESULT                                                                                                                                                                                                                                                     | REFERENCE                                                                                                                                                                           |
|-----|--------------------------------------------------------------------------------------------------------------------------------------------------------|-----------------------------------------------------------------------------------------------------------------------------------------------------|---------------------------------------------------------------------------------------------------------------------------------------------------------------------------------------------------------------------------------------------------------------------|-------------------------------------------------------------------------------------------------------------------------------------------------------------------------------------|
| 1   | Neutrophil-mediated oxidative stress and albumin structural damage predict COVID-19-associated mortality                                               | Evaluate the effect of oxidative stress on albumin as an antioxidant molecule                                                                       | Human serum albumin (HSA) from survivors showed a significantly reduced protein packing order parameter, suggesting that a reduced state of this protein protects against the severity of COVID-19                                                                  | Badawi <i>et al.</i> , 2021.Medrxiv, Doi: <a href="https://Doi.org/10.1101/2021.04.01.21254767">https://Doi.org/10.1101/2021.04.01.21254767</a>                                     |
| 2   | Impact of thiol-disulfide balance on the binding of COVID-19 Spike protein with Angiotensin Converting Enzyme 2 receptor.                              | Study the dynamic molecular simulation of the thiol-disulfide balance on the interaction between SARS-CoV/CoV-2 spike protein and the ACE2 receptor | When the thiol groups of cysteines in both the protein and receptor are reduced, the affinity is weaker, providing a possible molecular basis for understanding cellular recognition of the virus according to oxidative stress                                     | Hati, Bhattacharyya. 2020. ACS Omega 23;5(26):16292-16298.                                                                                                                          |
| 3   | Disruption of disulfides within RBD of SARS-CoV-2 spike protein prevents fusion and represents a target for viral entry inhibition by registered drugs | Evaluate the role of sulfhydryl bonds in the RBD and spike protein and their role in viral fusion                                                   | They demonstrated that the integrity of disulfide bonds within the receptor-binding domain (RBD) plays an important role in the membrane fusion process, indicating that an oxidized state of these molecules on the receptor facilitates virus entry into the cell | Manček-Keber <i>et al.</i> , 2021 FASEB J 35(6):e21651. Doi: <a href="https://doi.org/10.1096/fj.202100560R">10.1096/fj.202100560R</a> .                                            |
| 4   | SARS-CoV2 infection impairs the metabolism and redox function of cellular glutathione                                                                  | Investigate an in vitro model of Vero E6 cells infected with SARS-CoV-2.                                                                            | Significantly reduced levels of cellular thiols. Elevated levels of oxidized glutathione (GSSG) and protein glutathionylation were also observed, showing that the cellular antioxidant system is affected by the SARS-CoV-2 virus.                                 | Bartolini <i>et al.</i> , 2021. Redox Biol. 45:102041. Doi: <a href="https://doi.org/10.1016/j.redox.2021.102041">10.1016/j.redox.2021.102041</a>                                   |
| 5   | Association of GSTM1 and GSTT1 gene polymorphisms with COVID-19 susceptibility and its outcome                                                         | Investigate the role of GSTM1 and GSTT1 gene polymorphisms with COVID-19 susceptibility                                                             | COVID-19 patients with GSTT1 <sup>-/-</sup> genotypes, indicating the absence of the enzyme, exhibited the highest mortality                                                                                                                                        | Abbas <i>et al.</i> , 2021. J Med Virol ;93(9):5446-5451. Doi: <a href="https://doi.org/10.1002/jmv.27076">10.1002/jmv.27076</a> .                                                  |
| 6   | Upregulation of oxidative stress gene markers during SARS-CoV-2 viral infection                                                                        | Evaluate the expression of 125 oxidative stress genes, 37 pro-oxidant genes, 32 oxidative response genes, and 56 antioxidant genes.                 | Seven oxidative stress genes were upregulated in leukocytes and autopsied lungs; oxidative and antioxidant response genes.                                                                                                                                          | Sharif-Askari <i>et al.</i> 2021. Free Radic Biol Med. 20;172:688-698. Doi: <a href="https://doi.org/10.1016/j.freeradbiomed.2021.06.018">10.1016/j.freeradbiomed.2021.06.018</a> . |



The second group of selected works responded to the keywords COVID-19/oxidative stress and the established criterion that they were not reviews, case studies, editorials, hypotheses, or comments. Seventeen studies were selected, of which 11 were clinical research studies, one was a pilot study, one was a cross-sectional comparative study, one was a single-center retrospective study, one was an observational study, and one was a multicenter study (Table 2).

The results obtained in seven (7) of the reviewed studies evaluated thiols as an indicator of the oxidative state of COVID-19 patients, concluding that these molecules are predictors of severity and admission to the ICU (intensive care unit) for COVID-19 patients (Ducastel et al. 2021; Pincemail et al. 2021; Çakırca et al. 2021; Aykac et al. 2021; Martinez et al. 2021; Kalem et al. 2021; Cekerevac et al. 2021; Table 2).

In studies where glutathione concentrations were determined, it was found that this parameter was decreased in COVID-19 patients (Muhammad et al., 2021; Pincemail et al., 2021; Karkhanei et al., 2021; Gadotti et al., 2021; Cekerevac et al., 2021; Table 2).

COVID-19 patients showed an increase in the activity of antioxidant enzymes such as superoxide dismutase, catalase, and glutathione peroxidase (Pincemail et al., 2021; Muhammad et al., 2021; Gadotti et al., 2021; Mehri et al., 2021; Cekerevac et al., 2021). Oxidative stress biomarkers belonging to the category of oxidative damage indicators, such as malondialdehyde (MDA), ischemia-modified albumin (IMA), sulfhydryl groups, advanced glycation end products (AGEs), oxidized guanine, and peroxides, were elevated in COVID-19 patients and increased with the severity of the disease (Daskaya et al. 2021; Muhammad et al. 2021; Pincemail et al. 2021; Zendelovska et al. 2021; Ducastel et al. 2021; Aykac et al. 2021; Gadotti et al. 2021; Cekerevac et al. 2021; Kosanovic et al. 2021; Mehri et al. 2021; Yildiz et al. 2021; Petrushevska et al. 2021; Martinez et al. 2021; Lorente et al. 2021; Table 2).

The results reported regarding the oxidative stress biomarkers evaluated in COVID-19 patients indicate the high commitment of the body's antioxidant system to the pathogenesis of the disease caused by the SARS-CoV-2 virus (Table 2).

**Table 2**

*Studies evaluating oxidative stress based on primary metabolites of the antioxidant system generated or participating in the oxidative stress process in COVID-19 patients.*

| <b>No.</b> | <b>TITLE</b>                                                                                                                                        | <b>OBJECTIVES</b>                                                                                    | <b>RELEVANT RESULTS</b>                                                                                                                                                                                                           | <b>STUDY TYPE/REFERENCE</b>                                                                       |
|------------|-----------------------------------------------------------------------------------------------------------------------------------------------------|------------------------------------------------------------------------------------------------------|-----------------------------------------------------------------------------------------------------------------------------------------------------------------------------------------------------------------------------------|---------------------------------------------------------------------------------------------------|
| 1          | Usefulness of oxidative stress marker evaluation at admission to the intensive care unit in patients with COVID-19                                  | Evaluate total antioxidants, total oxidants, catalase, and myeloperoxidase.                          | No significant relationship was observed between clinical severity and oxidative stress markers                                                                                                                                   | Investigación clínica/ Daskaya <i>et al.</i> , 2021. Int Med Res ;49(7):3000605211027733          |
| 2          | Deficiency of antioxidants and increased oxidative stress in COVID-19 patients: A cross-sectional comparative study in Jigawa, Northwestern Nigeria | Evaluate antioxidant levels and oxidative stress markers in COVID-19 patients.                       | Low concentrations of vitamins A, C, Se, Zn, Mg, and Cu were found in people with COVID-19. GSH, GSx, catalase, and SOD activity were lower in patients than in controls.                                                         | Estudio comparativo transversal / Muhammad <i>et al.</i> , 2021 SAGE Open Med;9:2050312121991246  |
| 3          | Oxidative Stress Status in COVID-19 Patients Hospitalized in Intensive Care Unit for Severe Pneumonia. A Pilot Study                                | Evaluate oxidative stress status in COVID-19 patients hospitalized in ICU.                           | Patients showed decreased values of vitamin A and C, protein thiols, GSH, $\gamma$ -tocopherol, $\beta$ -carotene, and total antioxidant power compared to laboratory reference values. C-reactive protein and MDA were elevated. | Estudio piloto/ Pincemail <i>et al.</i> 2021 Antioxidants (Basel) 10(2):257.                      |
| 4          | Evaluation of oxidative stress markers in hospitalized patients with                                                                                | Measure total antioxidant power, reduced iron, and plasma peroxides and correlate with CRP, LDH, and | Patients had the highest values of plasma peroxides, which correlated with CRP, LDH, and INL, except for oxidative stress index and CRP in the severe COVID-19 group.                                                             | Investigación clínica /Zendelovska <i>et al.</i> 2021 J Intern Med . Doi: 10.2478/rjim-2021-0014. |

|   |                                                                                                                                                 |                                                                                                                                                                                                             |                                                                                                                                                                                                                   |                                                                                                                  |
|---|-------------------------------------------------------------------------------------------------------------------------------------------------|-------------------------------------------------------------------------------------------------------------------------------------------------------------------------------------------------------------|-------------------------------------------------------------------------------------------------------------------------------------------------------------------------------------------------------------------|------------------------------------------------------------------------------------------------------------------|
|   | moderate and severe COVID-19                                                                                                                    | INL in patients with moderate and severe COVID-19.                                                                                                                                                          |                                                                                                                                                                                                                   |                                                                                                                  |
| 5 | Evaluation of oxidative stress level: total antioxidant capacity, total oxidant status and glutathione activity in patients with COVID-19       | Measure GSH, total antioxidant capacity (CATOTAL), and total oxidant status in the serum of COVID-19 patients                                                                                               | Total oxidant status was lower in controls; GSH increased in COVID-19 patients. CATOTAL activity in non-ICU patients was not different from the control                                                           | Investigación clínica /Karkhanei <i>et al.</i> , 2021. <i>New Microbes New Infect</i> 42:100897                  |
| 6 | Oxidative stress and inflammatory biomarkers for the prediction of severity and ICU admission in unselected patients hospitalized with COVID-19 | Determine thiols, advanced oxidation protein products (AOPP), ischemia-modified albumin (IMA), IL-6, presepsin, and cellular activation biomarkers calprotectin in plasma of patients admitted for COVID-19 | Thiol concentration decreased while IMA, IL-6, calprotectin, and presepsin increased with COVID-19 severity and were associated with the need for O2 and ICU admission                                            | Monocentriico retrospectivo /Ducastel <i>et al.</i> , 2021 <i>Int j mol sci</i> 12;22(14):7462                   |
| 7 | Thiol level and total oxidant/antioxidant status in patients with COVID-19 infection                                                            | Evaluate oxidative stress markers (thiols, EAT, EOT, and OSI) to determine if they were predictors of ICU admission                                                                                         | They found that increased oxidative stress and decreased antioxidant levels were associated with COVID-19 severity and that measuring the oxidative stress index can determine ICU admission of COVID-19 patients | Investigación Clínica/ Çakırca <i>et al.</i> , 2021. <i>Ir J Med Sci</i> 1;1-6. Doi: 10.1007/s11845-021-02743-8. |
| 8 | Oxidant and antioxidant balance in patients with COVID-19                                                                                       | Evaluate total thiols, acid-soluble thiols                                                                                                                                                                  | Lower levels of TT, TSA, and disulfides were found in COVID-19 adults. TT and TSA were lower in both children and adults with severe COVID-19.                                                                    | Investigación clínica / Aykac <i>et al.</i> , 2021. <i>Pediatr Pulmonol</i> ;56(9):2803-2810                     |
| 9 | Susceptibility of the patients infected with SARS-CoV-2 to oxidative stress and possible                                                        | Investigate the association between COVID-19 severity and oxidative stress parameters                                                                                                                       | No correlation was found between oxidative stress parameters and COVID-19 severity.                                                                                                                               | Investigación clínica / Gadotti <i>et al.</i> , 2021. <i>Free radic biol med</i> ;165:184-190.                   |

|    |                                                                                                                                            |                                                                                                                                                                                                          |                                                                                                                                                                                                        |                                                                                                                                                                                              |
|----|--------------------------------------------------------------------------------------------------------------------------------------------|----------------------------------------------------------------------------------------------------------------------------------------------------------------------------------------------------------|--------------------------------------------------------------------------------------------------------------------------------------------------------------------------------------------------------|----------------------------------------------------------------------------------------------------------------------------------------------------------------------------------------------|
|    | interplay with severity of the disease                                                                                                     |                                                                                                                                                                                                          |                                                                                                                                                                                                        |                                                                                                                                                                                              |
| 10 | Time course of redox biomarkers in COVID-19 pneumonia: relation with inflammatory, multiorgan impairment biomarkers and CT findings        | Evaluate oxidative damage to proteins, lipids, and DNA during the acute course of the disease                                                                                                            | Significant changes were observed in MDA, 8-hydroxy-2'-deoxyguanosine, and advanced oxidation protein products during the disease.                                                                     | Investigación clínica / Kosanovic <i>et al.</i> , 2021. <i>Antioxidants</i> 2021, 10(7), 1126; <a href="https://doi.org/10.3390/antiox10071126">https://doi.org/10.3390/antiox10071126</a>   |
| 11 | Changes in oxidative markers in COVID-19 patients                                                                                          | Evaluate oxidative stress markers in COVID-19 patients and compare them with controls                                                                                                                    | MDA and oxidative stress increased significantly in COVID-19 patients and showed the highest catalase and glutathione peroxidase activity in patients.                                                 | Investigación clínica / Mehri <i>et al.</i> , 2021. <i>Arch Med Res</i> 7;s0188-4409(21)00126-0.                                                                                             |
| 12 | Analysis of endogenous oxidative damage markers and association with pulmonary involvement severity in patients with SARS-CoV-2 pneumonia  | Compare endogenous oxidative damage markers (coenzyme Q10, nicotinamide dinucleotide oxidase 4 (NOX4), malondialdehyde (MDA), and ischemia-modified albumin (IMA)) in patients with SARS-CoV-2 pneumonia | High concentrations of ferritin, CoQ10, MDA, NOX4, and IMA were observed in SARS-CoV-2 pneumonia patients. CoQ10, MDA, NOX4, and IMA were higher in severe pneumonia patients than in non-severe ones. | Investigación clínica / Yildiz <i>et al.</i> , 2021 <i>Infect Dis Now</i> ;51(5):429-434                                                                                                     |
| 13 | Presentation of cytokine profile in relation to oxidative stress parameters in patients with severe COVID-19: an observational pilot study | Investigate the correlation between a set of cytokines and oxidative stress markers                                                                                                                      | Plasma peroxides and total antioxidant power were elevated in severe COVID-19 patients                                                                                                                 | Investigación clínica / Petrushevska <i>et al.</i> , 2021 <i>Research</i> 2021, 10:719 <a href="https://doi.org/10.12688/f1000research.55166.1">Doi.org/10.12688/f1000research.55166.1</a> ) |
| 14 | Acute lung injury biomarkers in the prediction of COVID-19 severity: total thiol, ferritin                                                 | Evaluate the potential discriminatory capacity of serum biomarkers in patients with ARDS                                                                                                                 | CRP, LDH, and ferritin were significantly higher in ARDS cases than in non-ARDS cases at the time of hospital admission. Total thiols were significantly lower in ARDS. Conversely, D-dimer, matrix    | Investigación clínica / Martinez <i>et al</i> 2021. <i>Antioxidants</i> (Basel)                                                                                                              |

|    |                                                                                                     |                                                                                    |                                                                                                                                                                                                                                                            |                                                                                                                    |
|----|-----------------------------------------------------------------------------------------------------|------------------------------------------------------------------------------------|------------------------------------------------------------------------------------------------------------------------------------------------------------------------------------------------------------------------------------------------------------|--------------------------------------------------------------------------------------------------------------------|
|    | and lactate dehydrogenase                                                                           | and those with mild to moderate disease (non-ARDS)                                 | metalloproteinase-9, and advanced glycation end-products were elevated.                                                                                                                                                                                    | . ;10(8):1221. Doi: 10.3390/antiox10081221.                                                                        |
| 15 | A useful and sensitive marker in the prediction of COVID-19 and disease severity: Thiol             | Investigate thiol homeostasis in COVID-19 patients.                                | COVID-19 patients with severe disease had the lowest TSA and total thiol levels compared to controls and those with moderate or mild COVID-19. Thiol groups have a strong predictive value for COVID-19 severity and are determinants of disease severity. | Investigación clínica/Kalem et al., 2021. Free Radic Biol Med 166:11-17. Doi: 10.1016/j.freeradbiomed.2021.02.009. |
| 16 | Predicting severity and intrahospital mortality in COVID-19: the place and role of oxidative stress | Determine predictors of COVID-19 severity and negative outcomes.                   | Superoxide serum levels were predictors of COVID-19 severity.                                                                                                                                                                                              | Estudio observacional/ Cekerevac et al., 2021. Oxid Med Cell Longev 2021:6615787. Doi: 10.1155/2021/6615787        |
| 17 | DNA and RNA Oxidative Damage and Mortality of Patients With COVID-19                                | Explore oxidative damage to DNA and RNA in survivors and non-survivors of COVID-19 | Oxidative damage to DNA and RNA was demonstrated in COVID-19 patients.                                                                                                                                                                                     | Estudio multicéntrico/ Lorente et al., 2021 Am J Med Sci.361(5):585-590.                                           |

In Table 3, the two categories of oxidative stress biomarkers evaluated in the reviewed studies are specified. In 11 of the 17 (64.7%) reviewed studies, a combination of antioxidant biomarkers and oxidative damage biomarkers was used.

Among the antioxidant biomarkers, the most commonly used were thiols and total antioxidant power, followed by the determination of glutathione, the measurement of antioxidant enzyme activity, and, to a lesser extent, the determination of selenium and zinc, beta-carotene, and vitamins A, D, C, and E (Figure 2).

On the other hand, the most commonly employed oxidative damage biomarkers were the determination of malondialdehyde and peroxides, followed by the determination of advanced oxidation protein products, ferritin, and, to a lesser extent, other indicators such as the measurement of myeloperoxidase enzyme activity, the quantification of ischemia-modified albumin, and the determination of lipid and plasma peroxides and oxidized guanine (Figure 3).

**Table 3***Oxidative stress biomarkers evaluated in COVID-19 patients.*

| No. | TITLE                                                                                                                                               | EVALUED OXIDATIVE STRESS BIOMARKERS                                                                                                         |                                                | REFERENCE                                                                   |
|-----|-----------------------------------------------------------------------------------------------------------------------------------------------------|---------------------------------------------------------------------------------------------------------------------------------------------|------------------------------------------------|-----------------------------------------------------------------------------|
|     |                                                                                                                                                     | EVALUED OXIDATIVE STRESS BIOMARKERS                                                                                                         | ANTIOXIDANT BIOMARKERS                         |                                                                             |
| 1   | Usefulness of oxidative stress marker evaluation at admission to the intensive care unit in patients with COVID-19                                  | Total antioxidant status, total oxidant status, catalase.                                                                                   | Ferritin, myeloperoxidase                      | Daskaya <i>et al.</i> , 2021. Int Med Res<br>49(7):3000605211027733         |
| 2   | Deficiency of antioxidants and increased oxidative stress in COVID-19 patients: A cross-sectional comparative study in Jigawa, Northwestern Nigeria | Glutathione, superoxide dismutase, glutathione peroxidase, vitamins A and D                                                                 | Malondialdehyde, 8-isoprostaglandin F2 alpha   | Muhammad <i>et al.</i> , 2021 SAGE Open Med;9:2050312121991246              |
| 3   | Oxidative Stress Status in COVID-19 Patients Hospitalized in Intensive Care Unit for Severe Pneumonia. A Pilot Study                                | Glutathione, protein thiols, glutathione peroxidase, vitamin C and E, beta-carotene, selenium, zinc, and copper, total antioxidant capacity | Lipid peroxides, myeloperoxidase, oxidized LDL | Pincemail <i>et al.</i> 2021 Antioxidants (Basel)<br>10(2):257.             |
| 4   | Evaluation of oxidative stress markers in hospitalized patients with moderate and severe COVID-19                                                   | Total antioxidant power                                                                                                                     | Plasma peroxides                               | Zendelovska <i>et al.</i> 2021 J Intern Med<br>Doi: 10.2478/rjim-2021-0014. |

|   |                                                                                                                                                 |                                                                                        |                                                                                       |                                                                                             |
|---|-------------------------------------------------------------------------------------------------------------------------------------------------|----------------------------------------------------------------------------------------|---------------------------------------------------------------------------------------|---------------------------------------------------------------------------------------------|
| 5 | Evaluation of oxidative stress level: total antioxidant capacity, total oxidant status and glutathione activity in patients with COVID-19       | Glutathione, total antioxidant capacity                                                | Not evaluated                                                                         | Karkhanei <i>et al.</i> , 2021. <i>New Microbes New Infect</i> ;42:100897                   |
| 6 | Oxidative stress and inflammatory biomarkers for the prediction of severity and ICU admission in unselected patients hospitalized with COVID-19 | Total thiols                                                                           | Advanced oxidation protein products, ischemia-modified albumin                        | Ducastel <i>et al.</i> , 2021 <i>Int J Mol Sci</i> 12;22(14):7462                           |
| 7 | Thiol level and total oxidant/antioxidant status in patients with COVID-19 infection                                                            | Total thiols, total antioxidant status, total oxidative status, oxidative stress index | Not evaluated                                                                         | Çakırca <i>et al.</i> , 2021. <i>Ir J Med Sci</i> 1;1-6. Doi: 10.1007/s11845-021-02743-8.   |
| 8 | Oxidant and antioxidant balance in patients with COVID-19                                                                                       | Total thiols, acid-soluble thiols                                                      | Sulfhydryl groups                                                                     | Investigación clínica / Aykac <i>et al.</i> , 2021. <i>Pediatr Pulmonol</i> 56(9):2803-2810 |
| 9 | Susceptibility of the patients infected with SARS-CoV-2 to oxidative stress and possible interplay with severity of the disease                 | Glutathione, total antioxidant capacity, glutathione transferase                       | Malondialdehyde, protein carbonylation, sulfhydryl groups, peroxides                  | Gadotti <i>et al.</i> , 2021. <i>Free radic biol med</i> ;165:184-190.                      |
|   | Time course of redox biomarkers in COVID-19 pneumonia: relation with inflammatory, multiorgan                                                   | Not evaluated                                                                          | Malondialdehyde, 8-hydroxy-2'-deoxyguanosine, and advanced oxidation protein products | Kosanovic <i>et al.</i> , 2021. <i>Antioxidants</i> 10(7), 1126;                            |



|    |                                                                                                                                            |                                                        |                                                                                                                        |                                                                                             |
|----|--------------------------------------------------------------------------------------------------------------------------------------------|--------------------------------------------------------|------------------------------------------------------------------------------------------------------------------------|---------------------------------------------------------------------------------------------|
| 10 | impairment biomarkers and CT findings                                                                                                      |                                                        |                                                                                                                        | <a href="https://Doi.org/10.3390/antiox10071126">https://Doi.org/10.3390/antiox10071126</a> |
| 11 | The comparison of oxidative markers between COVID-19 patients and healthy subjects                                                         | Catalase, superoxide dismutase, total oxidative status | Malondialdehyde                                                                                                        | Mehri et al., 2021. Arch Med Res 7;s0188-4409(21)00126-0.                                   |
| 12 | Analysis of endogenous oxidative damage markers and association with pulmonary involvement severity in patients with SARS-CoV-2 pneumonia  | Not evaluated                                          | Ferritin, malondialdehyde, ischemia-modified albumin, nicotinamide adenine dinucleotide oxidase 4 (NOX4), coenzyme Q10 | Yildiz et al., 2021 Infect Dis Now 51(5):429-434                                            |
| 13 | Presentation of cytokine profile in relation to oxidative stress parameters in patients with severe COVID-19: an observational pilot study | Total antioxidant power, oxidative stress index        | Plasma peroxides                                                                                                       | Petrushevska et al., 2021 Research 10:719<br>Doi.org/10.12688/f1000research.55166.1         |
| 14 | Acute lung injury biomarkers in the prediction of COVID-19 severity: total thiol, ferritin and lactate dehydrogenase                       | Total thiols                                           | Matrix metalloproteinase-9, advanced glycation end products, ferritin                                                  | Martinez et al 2021. Antioxidants (Basel). ;10(8):1221. Doi: 10.3390/antiox10081221.        |

|    |                                                                                                     |                                                 |                                                             |                                                                                                            |
|----|-----------------------------------------------------------------------------------------------------|-------------------------------------------------|-------------------------------------------------------------|------------------------------------------------------------------------------------------------------------|
| 15 | A useful and sensitive marker in the prediction of COVID-19 and disease severity: Thiol             | Total thiols                                    | Not evaluated                                               | Kalem <i>et al.</i> , 2021. Free Radic Biol Med<br>;166:11-17.Doi:<br>10.1016/j.freeradbiomed.2021.02.009. |
| 16 | Predicting severity and intrahospital mortality in COVID-19: the place and role of oxidative stress | Glutathione, catalase, and superoxide dismutase | Lipid peroxidation index (TBARS), peroxides, and superoxide | Cekerevac <i>et al.</i> , 2021. Oxid Med Cell Longev<br>;2021:6615787. Doi:<br>10.1155/2021/6615787        |
| 17 | DNA and RNA Oxidative Damage and Mortality of Patients With COVID-19                                | Not evaluated                                   | Oxidized guanine                                            | Lorente <i>et al.</i> , 2021 Am J Med Sci<br>.361(5):585-590.                                              |

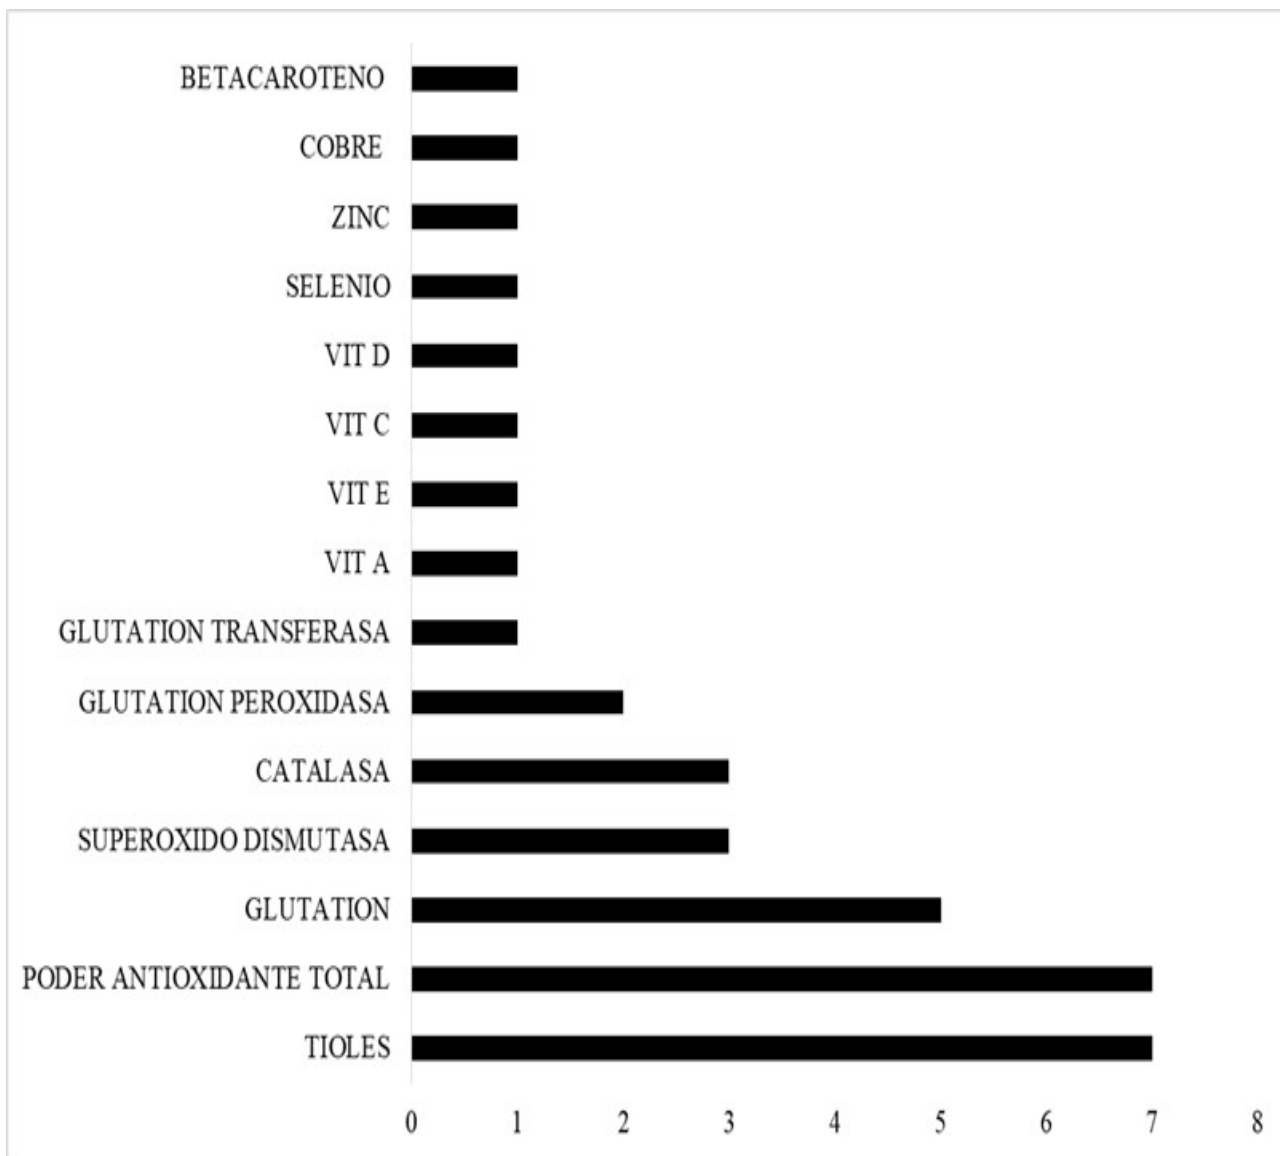

*Figure 2*

Antioxidant biomarkers determined in COVID-19 patients according to the reviewed literature. Years 2020-2021. Abbreviations: Vit D: vitamin D; Vit C: vitamin C; Vit E: vitamin E; Vit A: vitamin A.

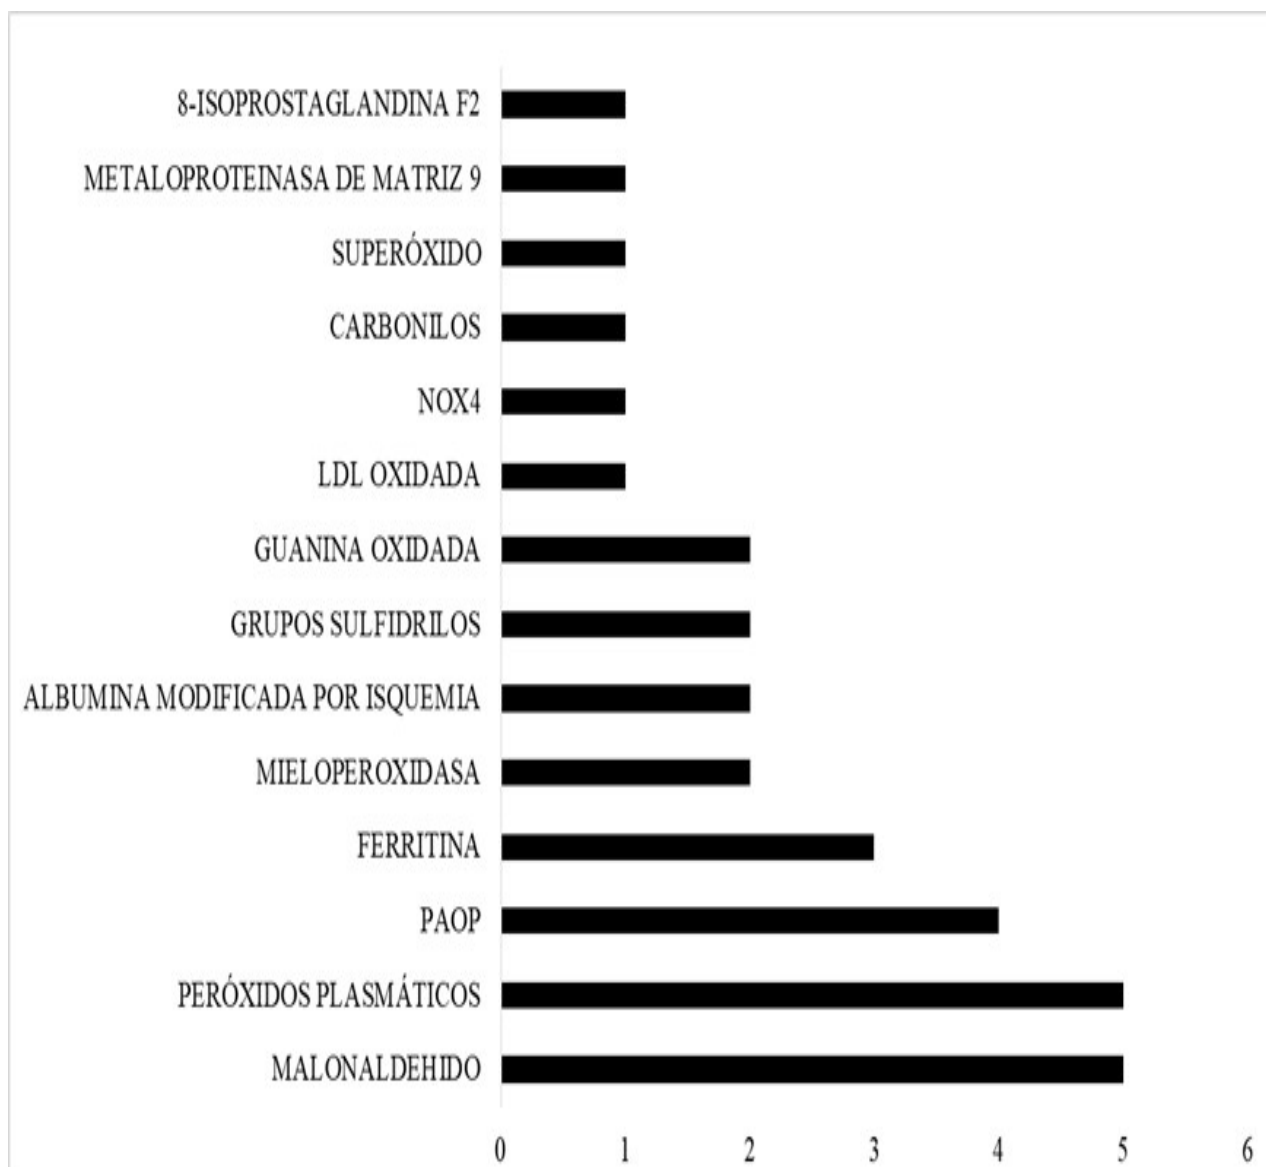

*Figure 3*

Oxidative damage biomarkers determined in COVID-19 patients according to the reviewed literature. Years 2020-2021. Abbreviations: PAOP: Advanced oxidation protein products; NOX4: Nicotinamide adenine dinucleotide oxidase 4.

## Discussion

This scoping review synthesizes the emerging global evidence on the association of oxidative stress with the progression of COVID-19 pathology and how this can explain the severity of this viral infection. The reviewed studies reinforce what was initially noted at the beginning of the COVID-19 pandemic by some authors about the central role of oxidative stress in the pathogenesis of this disease caused by the SARS-CoV-2 coronavirus. The reviewed literature indicates that the individual's redox state is diminished in the pathophysiological process of this disease.

The reviewed experimental studies provide evidence of the connection between the oxidative state of the body and the virulence and progression of COVID-19, as demonstrated by Abbas et al. (2021), who found that patients with the GSTT1<sup>-/-</sup> genotype showed the highest mortality from COVID-19. Similarly, Sharif-Askari et al. (2021) demonstrated that the SARS-CoV-2 virus induces the expression of oxidative stress genes. Manek-Keber et al. (2021) highlight the importance of disulfide bonds in the binding proteins of the virus to the receptor in the success of fusion and virulence, and Bartolini et al. (2021) demonstrate in Vero cells that the cellular antioxidant system is affected by the SARS-CoV-2 virus.

Regarding the oxidative stress biomarkers evaluated in COVID-19 patients, the reviewed studies show that a variety of biomarkers are being used. The determination of thiol groups, including total thiols (TT), acid-soluble thiols (TSA), and total antioxidant power, was the most commonly used. Some authors suggest that the determination of thiol groups is a sensitive biomarker to evaluate the oxidative state in COVID-19 patients (Pincemail et al., 2021; Ducastel et al., 2021; Çakırca et al., 2021; Aykac et al., 2021; Martinez et al., 2021; Kalem et al., 2021). Kalem et al. (2021) found a negative correlation between symptoms and TT and TSA levels in COVID-19 patients, indicating that there is a consumption of antioxidant molecules as the body fights the infection. Similarly, Ducastel et al. (2021) reported that a thiol concentration of <154 µmol/l was predictive of ICU admission in COVID-19 patients.

Thiol groups, which are predominantly found in protein structures, can form reversible disulfide bonds due to the presence of oxidants, maintaining a dynamic homeostasis of thiols and sulfhydryl groups. Since they are found in proteins, these groups are the body's major

antioxidants and play a crucial role against oxidative stress and in protecting against damage induced by free radicals. They are present both in cells and in plasma and serve as primary regulators of oxidative stress. In cases where there are high levels of oxidative stress, thiol levels decrease because they participate in neutralizing free radicals (Ulrich and Jakob 2019).

The determination of glutathione represented the second most evaluated oxidative stress biomarker in COVID-19 patients (Muhammad et al., 2021; Pincemail et al., 2021; Karkhanei et al., 2021; Gadotti et al., 2021; Cekerevac et al., 2021). Glutathione is a crucial antioxidant, well known for modulating the behavior of many cells, including immune system cells, enhancing innate and adaptive immunity, and providing protection against microbial, viral, and parasitic infections. According to Forman et al. (2016), low levels of GSH are associated with abnormalities in the pulmonary surfactant system, while normal intracellular GSH levels can exert critical negative control over the elaboration of pro-inflammatory cytokines.

Oxidative damage biomarkers such as malondialdehyde (MDA), an indicator of lipid peroxidation; 8-hydroxy-2'-deoxyguanosine (8-OHdG), a marker of DNA damage; ischemia-modified albumin (IMA); and advanced oxidation protein products (AOPP), which are biomarkers of protein structure damage, were also determined by some authors (Kosanovic et al., 2021; Yildiz et al., 2021; Ducastel et al., 2021; Daskaya et al., 2021).

Among the biomarkers mentioned in the previous paragraph, malondialdehyde, followed by the determination of advanced oxidation protein products, was the most frequently used. Oxidative damage biomarkers varied with the course of the disease and correlated with some inflammatory and tissue damage biomarkers (Kosanovic et al., 2021). Merhi et al. (2021) found that malondialdehyde levels in the serum of patients were significantly higher in the ICU group compared to non-ICU COVID-19 patients.

The production of free radicals during SARS-CoV-2 infection has the ability to modify macromolecules, causing damage to them. Oxidative damage to DNA and RNA has been reported in severe COVID-19 patients admitted to the ICU (Lorente et al., 2021).

The reviewed studies reinforce the strong association of SARS-CoV-2 with oxidative stress (OS) that triggers cytokine production, inflammation, and other pathophysiological activities (Li et al. 2020). The production of ROS induced by SARS-CoV-2 disrupts the antioxidant

defense system, which triggers a pro-inflammatory environment and severe tissue damage, contributing to fatal outcomes in patients. This would be one of the main reasons why patients with pre-existing conditions such as diabetes, hypertension, and pulmonary, cardiac, and renal diseases, which are pathologies associated with chronic inflammatory processes and oxidative imbalance, have a higher risk of developing severe infection (Lima-Martínez et al., 2021; Mihalopoulos et al., 2020; Li et al., 2020).

Similarly, the reviewed studies provide evidence of the well-known association between inflammation and oxidative stress. In the case of this global viral infection, the high production of free radicals by primary immune system cells such as neutrophils and macrophages (Borges et al. 2020) can oxidize macromolecules, as evidenced by the reviewed studies. This excessive production of ROS can structurally modify proteins, affect the metabolome, and modulate gene cascades involved in inflammatory response signaling pathways (Shi et al., 2021; Sharif-Askari et al., 2021), creating an oxidative-inflammatory spiral that characterizes severe cases of COVID-19 (Zendelovska et al., 2021), thus affecting all organs and facilitating the progression of the disease to more severe stages in patients with pre-existing conditions.

## **Conclusions**

The data provided in the reviewed experimental studies demonstrate the involvement of the oxidized state of the body in the success of SARS-CoV-2 infection and disease progression. This is evidenced by the significant decrease in antioxidant biomarkers in people with COVID-19, among them glutathione, thiols, total antioxidant capacity, antioxidant enzyme activity, and other antioxidant parameters such as beta-carotenes, zinc, selenium, and vitamins A, D, C, and E, as well as the significant increase in oxidative damage biomarkers such as malondialdehyde, advanced protein glycation end products, ferritin, ischemia-modified albumin, and lipid and plasma peroxides.

In 64.7% of the reviewed studies, a combination of oxidative stress biomarkers (antioxidant biomarkers) and oxidative damage was used. The most commonly used antioxidant biomarkers were thiol determination and total antioxidant power, followed by glutathione determination. The most commonly used oxidative damage biomarkers were

malondialdehyde determination and peroxides, followed by advanced oxidation protein products.

### **Strengths and limitations**

This scoping review focuses on the relationship between COVID-19 and oxidative stress, mapping the different biomarkers being used to monitor the oxidative state of COVID-19 patients. The study focused on publications of clinical research as well as experimental studies that could provide evidence of the central role of oxidative stress in the progression of disease severity.

This review also has limitations; one of them is that only three databases were used for the review of selected studies, which may have excluded some relevant studies on the topic.

### **Acknowledgments**

The authors would like to thank Licenciada Alejandra Sierra for her critical reading of the manuscript. We also extend our gratitude to Universidad Mariano Gálvez de Guatemala.

The authors declare that there are no conflicts of interest in the preparation of this work.



## References

- Abbas, M., Verma, Verma S., Siddiqui, S., Khan, F. H., Raza, S. T., Siddiqi, Z., Eba, A., & Mahdi, F. (2021). Association of GSTM1 and GSTT1 gene polymorphisms with COVID-19 susceptibility and its outcome. *Journal Medical Virology* 93(9):5446-5451. Doi: 10.1002/jmv.27076
- Aykac, K., Ozsurekci, Y., Yayla, B., Gurlevik, S., Oygur, P., Bolu, N.,... Ceyhan, M. (2021). Oxidant and antioxidant balance in patients with COVID-19. *Pediatric Pulmonology*, 56(9): 2803–2810.
- Arksey, H., & O'Malley, L. (2007). Scoping studies: towards a methodological framework. *International Journal Society Research Methodology*, 23;8:19e32. [Doi.org/10.1080/1364557032000119616](https://doi.org/10.1080/1364557032000119616).
- Badawy, M. A., Yasseen, B. A., El-Messiery, R. M., Abdel-Rahman, E. A., Elkhodiry, A. A., Kamel, A. G., El-Sayed, H., Shedra, A. M., Hamdy, R., Zidan, M., Al-Raawi, D., Hammad, M., Elsharkawy, N., El Ansary, M., Al-Halfawy, A., Elhadad, A., Hatem, A., Abouelnaga, S., Dugan, L. L., & Saad, S. A. (2021). Neutrophil-mediated oxidative stress and albumin structural damage predict COVID-19-associated mortality. *Elife*, 25;10:e69417. Doi: 10.7554/eLife.69417.
- Bartolini, D., Stabile, A. M., Bastianelli, S., Giustarini, D., Pierucci, S., Busti, C., Vacca C., Gidari, A., Francisci, D., Castronari, R., Mencacci, A., Di Cristina, M., Focaia, R., Sabbatini, S., Rende, M., Gioiello, A., Cruciani, G., Rossi, R., & Galli, F. (2021). SARS-CoV2 infection impairs the metabolism and redox function of cellular glutathione. *Redox Biology* 45:102041. Doi: 10.1016/j.redox.2021.102041
- Betteridge, D. J. (2000). What is oxidative stress?. *Metabolism*, 49(2 Suppl 1):3-8. Doi: 10.1016/s0026-0495(00)80077-3.
- Borges, L., Pithon-Curi, T. C., Curi, R., & Hatanaka, E. (2020). COVID-19 and Neutrophils: The Relationship between Hyperinflammation and Neutrophil Extracellular Traps. *Mediators Inflammatory*. 2:8829674. Doi: 10.1155/2020/8829674.

Çakırca, G., Çakırca, T. D., Üstünel, M., Torun, A., & Koyuncu, İ. (2021). Thiol level and total oxidant/antioxidant status in patients with COVID-19 infection. *Iran Journal Medical Science*, 1;1-6. Doi: 10.1007/s11845-021-02743-8.

Cekerevac, I., Turnic, T. N., Draginic, N., Andjic, M., Zivkovic, V., Simovic, S., Susa, R., Novkovic, L., Mijailovic, Z., Andjelkovic, M., Vukicevic, V., Vulovic, T., & Jakovljevic, V. (2021). Mar Predicting Severity and Intrahospital Mortality in COVID-19: The Place and Role of Oxidative Stress. *Oxidative Medical Cell Longevity*, 26;2021:6615787. Doi: 10.1155/2021/6615787.

Cordtz, R., Lindhardsen, J., Soussi, B.G., Vela, J., Uhrenholt, L., Westermann, R., Kristensen, S., Nielsen, H., Torp-Pedersen, C., & Dreyer, L. (2021). Incidence and severeness of COVID-19 hospitalization in patients with inflammatory rheumatic disease: a nationwide cohort study from Denmark. *Rheumatology (Oxford)*, 9;60(SI):SI59-SI67. Doi: 10.1093/rheumatology/keaa897.

Cristani, M., Speciale, A., Saija, A., Gangemi, S., Minciullo, P. L., & Cimino, F. Circulating Advanced Oxidation Protein Products as Oxidative Stress Biomarkers and Progression Mediators in Pathological Conditions Related to Inflammation and Immune Dysregulation. *Current of Medical Chemistry*, 23(34):3862-3882. Doi: 10.2174/0929867323666160902154748. PMID: 27593960.

Daskaya, H., Yilmaz, S., Uysal, H., Calim, M., Sümbül, B., Yurtsever, I., & Karaaslan, K. (2021). Usefulness of oxidative stress marker evaluation at admission to the intensive care unit in patients with COVID-19. *Journal of International Medical Research*, 49(7). Doi.org/10.1177/03000605211027733.

Delgado-Roche, L. & Mesta, F. (2020). Oxidative Stress as Key Player in Severe Acute Respiratory Syndrome Coronavirus (SARS-CoV) Infection. *Archive of Medical Research*, 51 (5): 384-387. [Doi.org/10.1016/j.arcmed.2020.04.019](https://doi.org/10.1016/j.arcmed.2020.04.019).

Demirci-Çekiç, S., Özkan, G., Avan, A.N., Uzunboy, S., Çapanoğlu, E., & Apak, R. (2022). Biomarkers of Oxidative Stress and Antioxidant Defense. *Journal of Pharmacy Biomedical Analysis*, 209:114477. Doi: 10.1016/j.jpba.2021.114477.

Ducastel, M., Chenevier-Gobeaux, C., Ballaa, Y., Meritet, J-F., Brack, M., Chapuis, N., Pene, F., Carlier, N., Szwebel, T-A., Roche, N., Terrier, B., & Borderie D. (2021). Oxidative Stress and Inflammatory Biomarkers for the Prediction of Severity and ICU Admission in Unselected Patients Hospitalized with COVID-19. *International Journal Molecular Science*, 22(14):7462. Doi: 10.3390/ijms22147462.

Forman, H.J., Zhang, H., & Rinna, A. (2009). Glutathione: overview of its protective roles, measurement, and biosynthesis. *Molecular Aspects of Medicine*, 30(1-2):1-12. Doi: 10.1016/j.mam.2008.08.006

Frijhoff, J., Winyard, P., Zarkovic, N., Davies, S., Stocker, R., Cheng, D., Knight, A., Taylor, E., Oetrich, J., Ruskovska, T., Gasparovic, A., Cuadrado, A., Weber, D., Poulsen, H., Grune, T., Schmidt, H., & Ghezzi, P. (2015). Clinical Relevance of Biomarkers of Oxidative Stress. *Antioxidant Redox Signal*, 23(14):1144-70. Doi: 10.1089/ars.2015.6317.

Gadotti, A., Lipinski, A., Vasconcellos, F.Tf., Marqueze, L F., Cunha, E. Bb., Campos, A. C., Oliveira, C. F., Amaral, A. Nm., Baena, C. P., Telles, J. P., Tuon, F. F., & Pinho, R.A (2021). Susceptibility of the patients infected with Sars-Cov2 to oxidative stress and possible interplay with severity of the disease. *Free Radical Biology Medicine*, 165:184-190. Doi: 10.1016/j.freeradbiomed.2021.01.044.

Hati, S., & Bhattacharyya, S. (2020). Impact of Thiol-Disulfide Balance on the Binding of Covid-19 Spike Protein with Angiotensin-Converting Enzyme 2 Receptor. *ACS Omega*, 5(26):16292-16298. Doi: 10.1021/acsomega.0c02125.

Lima-Martínez, M.M., Carrera Boada, C., Madera-Silva, M.D., Marín, W., & Contreras, M. (2021). COVID-19 and diabetes: A bidirectional relationship. *Clinical Investigation Arteriosclerosis*, 33(3):151-157. Doi: 10.1016/j.arteri.2020.10.001.

Li, X., Xu, S., Yu, M., Wang, K., Tao, Y., Zhou, Y., Shi, J., Zhou, M., Wu, B., Yang, Z., Zhang, C., Yue, J., Zhang, Z., Renz, H., Liu, X., Xie, J., Xie, M., & Zhao, J. (2020). Risk factors for severity and mortality in adult COVID-19 in patients in Wuhan. *Journal of Allergy Clinical Immunology*, 146: 110-118. Doi: 10.1016/j.jaci.2020.04.006.

Lorente, L., Martín, M. M., González-Rivero, AF., Pérez-Cejas, A., Cáceres, J. J., Perez, A., Ramos-Gómez, L., Solé-Violán, J., Marcos, Y., Ramos, J. A., Ojeda, N., & Jiménez, A.

- (2021). DNA and RNA Oxidative Damage and Mortality of Patients With COVID-19. *American Journal of Medical Science*, 361(5):585-590. Doi: 10.1016/j.amjms.2021.02.012.
- Kalem, A., Kayaaslan, B., Neselioglu, S., Eser, F., Hasanoglu, İ., Aypak, A., Akinci, E., Akca, N., Erel, O., & Gunera, R. (2021). A useful and sensitive marker in the prediction of COVID-19 and disease severity: Thiol. *Free Radical Biology and Medicine*, 166: 11–17. Doi: 10.1016/j.freeradbiomed.2021.02.009
- Karkhanei, B., Ghane, E., & Mehri, F. (2021). Evaluation of oxidative stress level: total antioxidant capacity, total oxidant status and glutathione activity in patients with COVID-19. *New Microbes and New Infection*, 42:100897. Doi: 10.1016/j.nmni.2021.100897.
- Korakas E, Ikonomidis I, Kousathana F, Balampanis K, Kountouri A, Raptis A, Palaiodimou L, Kokkinos A., & Lambadiari V. (2020). Obesity and COVID-19: immune and metabolic derangement as a possible link to adverse clinical outcomes. *American Journal of Physiological and Endocrinology Metabolism*, 1;319(1):E105-E109. doi: 10.1152/ajpendo.00198.2020
- Kosanovic, T., Sagic, D., Djukic, V., Pljesa-Ercegovac, M., Savic-Radojevic, A., Bukumiric, Z., Lalosevic, M., Djordjevic, M., Coric, V., & Simic, T. (2021). Time Course of Redox Biomarkers in COVID-19 Pneumonia: Relation with Inflammatory, Multiorgan Impairment Biomarkers and CT Findings. *Antioxidants (Basel)*, 10(7):1126. Doi: 10.3390/antiox10071126.
- Manček-Keber, M., Hafner-Bratkovič, I., Lainšček, D., Benčina, M., Govednik, T., Orehek, S., Plaper, T., Jazbec, V., Bergant, V., Grass, V., Pichlmair, A., & Jerala, R. (2021). Disruption of disulfides within RBD of SARS-CoV-2 spike protein prevents fusion and represents a target for viral entry inhibition by registered drugs. *FASEB Journal*, 35(6):e21651. Doi: 10.1096/fj.202100560R.
- Martinez, A., Cabrera, C., Martín-Montañez, E., Sanchez, E., Martinez, P., Romero-Zerbo, Y., Garcia-Fernandez, M., & Velasco, J. L. Acute Lung Injury Biomarkers in the Prediction of COVID-19 Severity: Total Thiol, Ferritin and Lactate Dehydrogenase *Antioxidants (Basel)*, 10(8):1221. Doi: 10.3390/antiox10081221.

Mehri, F., Rahbar, A. H., Ghane, E. T, Sour, B., & Esfahani, M. (2021). Changes in oxidative markers in COVID-19 patients. *Archives of Medical Research*, 52(8):843-849. Doi: 10.1016/j.arcmed.2021.06.004

Mihalopoulos, M., Dogra, N., Mohamed, N., Badani, K., & Kyprianou, N. (2020). COVID-19 and Kidney Disease: Molecular Determinants and Clinical Implications in Renal Cancer. *European Urology Focus*, 6(5):1086-1096. Doi: 10.1016/j.euf.2020.06.002

Muhammad, Y., Kani, Y., Iliya, S., Muhammad, J., Binji, A., Ahmad, A., Kabir, M., Bindawa, K., & Ahmed, A. (2021). Deficiency of antioxidants and increased oxidative stress in COVID-19 patients: A cross-sectional comparative study in Jigawa, Northwestern Nigeria. *SAGE Open Medicine*, 9:2050312121991246. Doi: 10.1177/2050312121991246.

Muhoberac, B. B. (2020). What Can Cellular Redox, Iron, and Reactive Oxygen Species Suggest About the Mechanisms and Potential Therapy of COVID-19?. *Frontiers of Cell Infectology and Microbiology*, 10:569709. Doi: 10.3389/fcimb.2020.569709.

Page, M.J., McKenzie, J. E., Bossuyt, P.M., Boutron, I., Hoffmann, T. C., Mulrow, C.D., Shamseer, L., Tetzlaff, J. M., Akl, E. A., Brennan, S. E., Chou, R., Glanville, J., Grimshaw, J.M., Hróbjartsson, A., Lalu, M.M., Li, T., Loder, E.W., Mayo-Wilson, E., McDonald, S., McGuinness, L.A., Stewart, L.A., Thomas, J., Tricco, A.C., Welch, V.A., Whiting, P., Moher, D. (2021). The PRISMA 2020 statement: an updated guideline for reporting systematic reviews. *TheBMJ*. 29;372:n71. doi: 10.1136/bmj.n71.

Peters, M. D., Godfrey, C. M., Khalil, H., Mc Inerney, P., Parker, D., & Soares, C. B. (2015). Guidance for conducting systematic scoping reviews. *International Journal of Evidence-Based Healthcare*, 13,141–146. [Doi.org/10.1097/XEB.0000000000000050](https://doi.org/10.1097/XEB.0000000000000050)

Petrushevska, M., Zendelovska, D., Atanasovska, E. (2021). Presentation of cytokine profile in relation to oxidative stress parameters in patients with severe COVID-19: an observational pilot study. *F1000 Research*, 10:719. [Doi:10.12688/f1000research.55166.1](https://doi.org/10.12688/f1000research.55166.1).

Pincemail, J., Cavalier, E., Charlier, C., Cheramy-Bien, J-P., Brevers, E., Courtois, A., Fadeur, M., Meziane, S., Le Goff, C., Misset, B., Albert, A., Defraigne, J-O., & Rousseau,

A-F. (2021). Oxidative Stress Status in COVID-19 Patients Hospitalized in Intensive Care Unit for Severe Pneumonia. A Pilot Study. *Antioxidants (Basel)*, *10*(2): 257.

Doi: 10.3390/antiox10020257

Polonikov, A. (2020). Endogenous Deficiency of Glutathione as the Most Likely Cause of Serious Manifestations and Death in COVID-19 Patients. *ACS Infectious Diseases*, *6* (7), 1558-1562. Doi: 10.1021/acsinfecdis.0c00288

Sharif-Askari, N. S., Sharif-Askari, F. S., Mdkhana, B., Hussain, A. H. A., Alsafar, H., Faoor, A. Z., Hamid, Q., & Halwani, R. (2021). Upregulation of oxidative stress gene markers during SARS-COV-2 viral infection. *Free Radical Biology Medicine*, *172*:688-698. Doi: 10.1016/j.freeradbiomed.2021.06.018.

Shevtsova, A., Gordiienko, I., Tkachenko, V., & Ushakova, G. (2021). Ischemia-Modified Albumin: Origins and Clinical Implications. *Disease Markers*, *2021*:9945424. Doi: 10.1155/2021/9945424.

Shi, D., Yan, R., Lv, L., Jiang, H., Lu, Y., Sheng, J., Xie, J., Wu, W., Xia, J., Xu, K., Gu, S., Chen, Y., Huang, C., Guo, J., Du, Y., & Li, L. (2021). The serum metabolome of COVID-19 patients is distinctive and predictive. *Metabolism*, *118*:154739. Doi: 10.1016/j.metabol.2021.154739.

Suhail, S., Zajac, J., Fossum, C., Lowater, H., McCracken, C., & Severson, N. (2020). Role of Oxidative Stress on SARS-CoV (SARS) and SARS-CoV-2 (COVID-19) Infection: A Review. *The Protein Journal*, [Doi: 10.1007/s10930-020-09935-8](https://doi.org/10.1007/s10930-020-09935-8).

Ulrich, K., & Jakob, U. (2019). The role of thiols in antioxidant systems. *Free Radical Biology and Medicine*, *140*:14-27. Doi: 10.1016/j.freeradbiomed.2019.05.035.

WHO. Coronavirus disease 2019 (COVID-19) situation reported. Available at:-, [https://www.who.int/docs/defaultsource/coronaviruse/situationreports/20200601-covid-19-sitrep-133.pdf?sfvrsn%3D49a56f2ac\\_4](https://www.who.int/docs/defaultsource/coronaviruse/situationreports/20200601-covid-19-sitrep-133.pdf?sfvrsn%3D49a56f2ac_4). [Acceso 2 febrero 2022].

Yildiz, H., Hakan Alp, H., Ekin, S., Arisoy, A., Gunbatar, H., Asker, S., Mermiç, B., Sunnetcioglu, A., Celikel, M., Esen, N., Bedirhanoglu, S., Delal Baykal, N., & Haylu, M. (2021). Analysis of endogenous oxidative damage markers and association with pulmonary

involvement severity in patients with SARS-CoV-2 pneumonia. *Infectology Disease Now*, 51(5):429-434. Doi: 10.1016/j.idnow.2021.06.302

Zendelovska, D., Atanasovska, E., Petrushevska, M., Spasovska, K., Stevanovikj, M., Demiri, I., & Labachevski, N. (2021). Evaluation of oxidative stress markers in hospitalized patients with moderate and severe COVID-19. *Romanian Journal of Internal Medicine*, Doi: 10.2478/rjim-2021-0014.
